# Supplementary material for: Membrane-free osmotic desalination at near-room temperatures enabled by thermally responsive polyionic liquid hydrogels
Source: Royal Society of Chemistry journal article supplement (doi:10.1039/d2ta06869a), 2022-01-01
Supplement: d2ta06869a1.pdf [file d2ta06869a1.pdf]

# Membrane-Free Osmotic Desalination at Near-room Temperatures Enabled by Thermally-Responsive Polyionic Liquid Hydrogels

Xueyu Yuan<sup>a</sup>, Yufeng Cai<sup>\*c</sup>, Jing Jiang<sup>a</sup>, Zihao Zhou<sup>a</sup>, Chengwei Wang<sup>a</sup>, Jinhua Hu<sup>d,e</sup>,  
Li Liu<sup>a</sup>, Bing Li<sup>a</sup>, Ming Liu<sup>\*a,b</sup>

- a. School of Chemistry and Chemical Engineering, Harbin Institute of Technology,  
Harbin, 150001, PR China
- b. Engineering Laboratory of Advanced Energy Materials, Ningbo Institute of  
Materials Technology & Engineering, Chinese Academy of Sciences, Ningbo  
315201, China
- c. State Key Laboratory of Special Functional Waterproof Materials, Beijing  
Oriental Yuhong Waterproof Technology Co. Ltd, Beijing 101111, China
- d. State Key Laboratory of Food Science and Technology, Jiangnan University,  
Wuxi 214122, China
- e. School of Food Science and Technology, Jiangnan University, Wuxi 214122,  
China

## Materials and Methods

**Materials:** Tripentylamine (mixture of branched-chain isomers), and Tripropylamine were commercially available from TCI and used without further purification. 4-chloromethyl styrene, acetonitrile, and diethyl ether were commercially available from Aladdin. 2,2-azobis (2-methylpronamidine) dihy, poly (ethylene glycol) dimethacrylate (PEGDM) were purchased from Sigma-Aldrich. Deionized water was used for all the experiments.

**Preparation of N<sub>555VB</sub>Cl IL monomer:** N<sub>555VB</sub>Cl was prepared according to a method reported elsewhere.<sup>[1]</sup> Tripentylamine (12.8 g, 54 mmol) was added to a solution of 4-chloromethyl styrene (10.1g, 60 mmol) in acetonitrile (50 mL) under a nitrogen atmosphere. The mixture was stirred and refluxed for 24 h. After the removal of acetonitrile, the crude product was washed with diethyl ether several times and dried in a vacuum at room temperature to obtain N<sub>555VB</sub>Cl (12.0 g, 52 % yield) as a white solid.

**Preparation of N<sub>333VB</sub>Cl IL monomer:** Tripropylamine (16 g) was added to a solution of 4-chloromethylstyrene (10.1 g) in acetonitrile (50 mL) under a nitrogen atmosphere. Post-treatment of N<sub>333VB</sub>Cl (15 g, 57% yield) was consistent with N<sub>555VB</sub>Cl. The structures of IL monomers prepared in this study are shown in Figure 1.

**The preparation of PNCl-1 hydrogel:** PNCl-1 gel was prepared by combining N<sub>555VB</sub>Cl monomer, 2,2-azobis (2-methylpronamidine) dihydrochloride, and PEGDM at a molar ratio of 100: 1: 0.1 and 100: 1: 0.2. First, the N<sub>555VB</sub>Cl monomer was mixed with water (water content: 20 wt%) and PEGDM, and degassed by sonication.

Subsequently, 2,2-azobis (2-methylpronamide) dihydrochloride was added under an  $N_2$  atmosphere and the mixture was transferred into a vial. The vial was sealed and heated at 60 °C for 6 h. The resulting TPIL gel was soaked in deionized water at 1 °C for at least 2 days to remove residual monomer and was completely dried for subsequent studies.

**The preparation of PNCl-2 hydrogel:** The  $N_{555VB}Cl$  and  $N_{333VB}Cl$  monomers were mixed at a mass ratio of 95:5, 90:10, and 80:20, followed by mixing with water (water content: 20 wt%) and PEGDM. The 2,2-azobis (2-methylpronamide) dihydrochloride was added under the  $N_2$  atmosphere. Post-treatment of PNCl-2 gel was consistent with the PNCl-1 gel described above.

**The preparation of MXene/IL gel:** The  $N_{555VB}Cl$  and  $N_{333VB}Cl$  monomer at a mass ratio of 95:5 was mixed with  $Ti_3C_2T_x$  MXene (1, 3, 5 mg mL<sup>-1</sup>), water (water content: 20 wt%) and PEGDM. The 2,2-azobis (2-methylpronamide) dihydrochloride was added under the  $N_2$  atmosphere. Post-treatment of MXene/IL hybrid gel was consistent with PNCl-1 gel.

**Characterization:** Scanning electron microscopy (SEM, Quanta 200, FEI, US), operating at 15 kV, and Energy-dispersive X-ray spectroscopy (EDX) were used to analyze the morphologies and element content of the as-prepared TPIL gels. X-ray photoelectron spectroscopy (XPS, BIC Corporation, US) and Fourier transform infrared spectroscopy (FT-IR, AVATAR 360, Nicolet, US) were used to analyze the functional groups and elemental contents. The XPS test employs Al  $K\alpha$  ray, and the incident photoelectron energy is 1486.6 eV. With photochemical reagent potassium

bromide as a reference, the as-prepared gels were scanned between 400 and 4000  $\text{cm}^{-1}$  at a test rate of 4  $\text{cm}^{-1}$ . The water contact angle was measured by the OCA20 machine (Data-physics). The UV-vis-NIR spectra were obtained by a UV-Vis-NIR spectrophotometer (Agilent Cary 5000). Temperature profiles and thermal images of the samples were recorded by a Testo 869 infrared camera. The one-sun solar irradiation was provided by a CEL-S500 Solar Simulator. The concentration of ions of the treated water collected from swelling PNCI gel was tracked by ICP-OES (Thermo, Icap 7400). The salt rejection was determined by the equation,  $(1-(C_m/C_o)) \times 100\%$ , where  $C_m$  is the measured ion concentration and  $C_o$  is the original ion concentration in aq. solution. A thermogravimetric analyzer (TGA) was utilized to test the MXene/IL gel samples. All the samples were dehydrated at 120 °C before TGA tests. TOC of the freshwater was measured by TOC-L.

**The measurement of swelling degree:** we have prepared PNCl-1 and PNCl-2 hydrogels, and their swelling degree has been evaluated after immersing the TPIL gels in aq. NaCl solution (1 L). with different NaCl concentrations at 1.0 °C for 48 h. Then, the TPIL hydrogels were immersed in different aq. NaCl soln. (75 to 600 mmol L<sup>-1</sup>), and subsequently heated up to the selected temperature (1-80 °C) and kept them for 10 min. The TPILs gels after soaking in pure water or aq. NaCl solutions were calculated by the following equation:

$$\text{Swelling degree (g/g)} = (W_{\text{water}} - W_{\text{dry}}) / W_{\text{dry}}$$

$W_{\text{water}}$ : the weight of water-saturated gel;  $W_{\text{dry}}$ : the weight of fully dehydrated dry gel.

**Rejection of NaCl:** With ICP OES tests, we measured the concentration of Na<sup>+</sup> in salt water (600, 300, 150, 75 mmol L<sup>-1</sup> NaCl) obtained from PNCl-2 hydrogels. Firstly, PNCl-2 hydrogels were soaked separately in different concentrations of NaCl for 12 h. Then, the gel surface was quickly cleaned with water of 60 °C and wiped off with clear paper, and the water generated under simulated sunlight was collected to test.

**Rejection of KCl, Na<sub>2</sub>SO<sub>4</sub>, NaHCO<sub>3</sub>:** With ICP OES tests, we measured the concentration of K<sup>+</sup> in 600 mmol L<sup>-1</sup> KCl, Na<sup>+</sup> in 300 mmol L<sup>-1</sup> Na<sub>2</sub>SO<sub>4</sub>, and Na<sup>+</sup> in 300 mmol L<sup>-1</sup> NaHCO<sub>3</sub> obtained from PNCl-2 hydrogels. Firstly, PNCl-2 hydrogel was soaked in the solution for 12 h. The gel surface was quickly cleaned with water of 60 °C. Then, wipe it off with clear paper, and the water generated under simulated sunlight was collected to test.

**The measurement of the concentration of Cl<sup>-</sup> in the PNCI-2 hydrogel.** The concentration of counterions within the P<sub>555-333VB</sub>Cl hydrogel was estimated to be ~ 2.12 M by assuming all the confined counterions are dissociated.

**Calculation of mass loss:** With regards to efficient water production for potential practical application, the repeatability of the mass loss of hydrogels should be taken into consideration. To begin with, three pieces of MXene/IL hydrogels prepared separately under the same conditions were placed in 600 mmol L<sup>-1</sup> salt water and let to reach the saturation state. The gels were placed under artificial one-sun illumination to induce phase change and hence water release. The water collected was weighed at different time interval.

**Calculation of water collection efficiency:** To measure the water collection efficiency, the swollen MXene/IL gel was exposed to simulated sunlight with a radiation intensity of 1 kW m<sup>-2</sup> (one sun, 300 W xenon arc lamp) in the air at an ambient temperature of 25 °C. Temperature variation of the MXene/IL hydrogel was measured by using a thermometer at each time interval. Simultaneously, PNCI-1 and PNCI-2 hydrogels and their temperature were evaluated under the same condition. The mass change of TPIL hydrogels was recorded by an electronic mass balance at various times. Because of the hydrophilicity switching of ionic gels and the heating effect of MXene, the weight loss over the entire process was due to water release.

**Water collection from salt water:** The clean water collection process was carried out by immersing TPIL hydrogels in the salt water (600, 300, 150, 75 mmol L<sup>-1</sup> NaCl) for 48 h separately, and then the swelled TPIL hydrogels were taken out and irradiated

with sunlight to generate clean water.

**The differential scanning calorimeter (DSC):** The LCST of gels was measured by a differential scanning calorimeter (DSC). All gels were put in water to reach the equilibrium state and dry excess water was with filter paper before measurement. TPIL gels ( $\approx 30$  mg) were then loaded in aluminum cells and sealed hermetically. The thermal analysis was performed in a temperature range of 20 – 60 °C with a heating rate of 3 °C min<sup>-1</sup> in a dry N<sub>2</sub> atmosphere. However, since there was no endothermic and exothermic peak in the spectrogram tested by DSC, rheological tests and changes in gel transparency were used to characterize the phase transition process in Figure 1 i, j.

**Rejection obtained by electrical resistance:**

$$\text{Rejection} = \frac{R1 - R2}{R1} \quad (\text{S1})$$

Where R1 and R2 denote the electrical resistance of the elute recovered from PNC1-2 hydrogel with DC=0.2% (1.428 MΩ), 600 mmol/L aq. NaCl solution (0.310 MΩ).

**Rejection calculated by Donnan approximation:**

$$C_s^g = \left[ \left( \frac{\alpha C_{pol}}{2} \right)^2 + (C_s^b)^2 \right]^{\frac{1}{2}} - \frac{\alpha C_{pol}}{2} \quad (\text{S2})$$

where  $C_s^g$ ,  $C_{pol}$ , and  $\alpha$  denote the salt concentration of gel, the polymer concentration, and the fraction of charge monomers inside the gel.

$$\text{Rejection} = (C_s^b - C_s^g) / C_s^b$$

$$C = \exp \left( - \frac{C_{pol}}{2C_s^g + \alpha C_{pol}} \frac{6\alpha^2 N \lambda_B}{\kappa R_0^2 (1 + \xi)} \right) \quad (\text{S3})$$

where  $N$ ,  $\lambda_B$ ,  $R_0$ ,  $K$ ,  $\xi$  denote the number of monomer units connecting two junctions, the end-to-end distance of a free chain in solution, the inverse Debye screening length, and the parameter  $\xi$  are used to simplify the notation [2].

**Absorption spectra of MXene/IL gel:** MXene/IL gel were recorded with UV-vis-NIR spectrophotometer equipped with an integrating sphere.

$$A\% = 1 - T\% - R\% \quad (S4)$$

Where A represents absorption, T represents transmittance, R represents reflectivity.



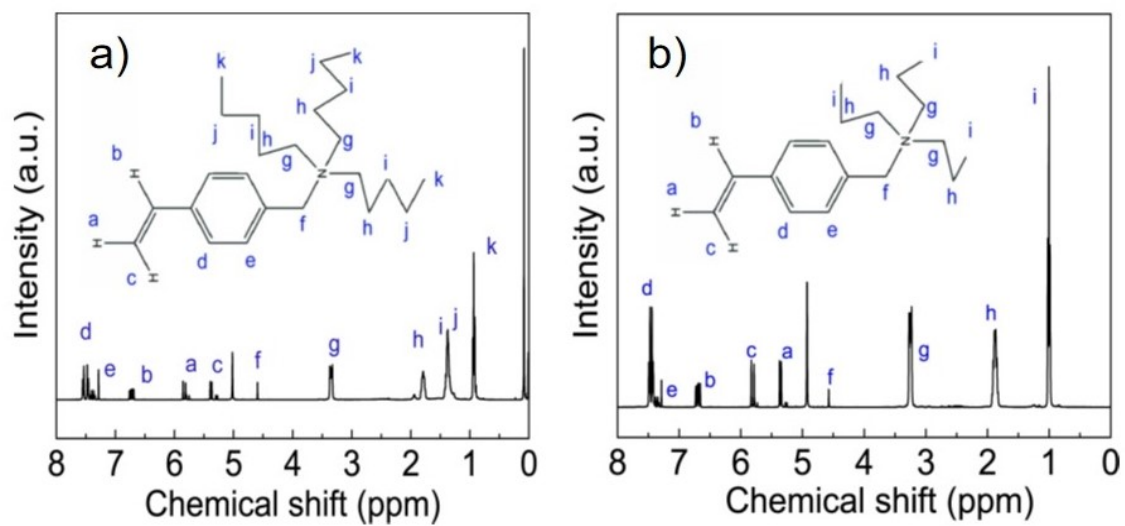

**Fig. S1**  $^1\text{H}$  NMR spectra of a)  $\text{N}_{555}\text{vBCl}$ , b)  $\text{N}_{333}\text{vBCl}$ .

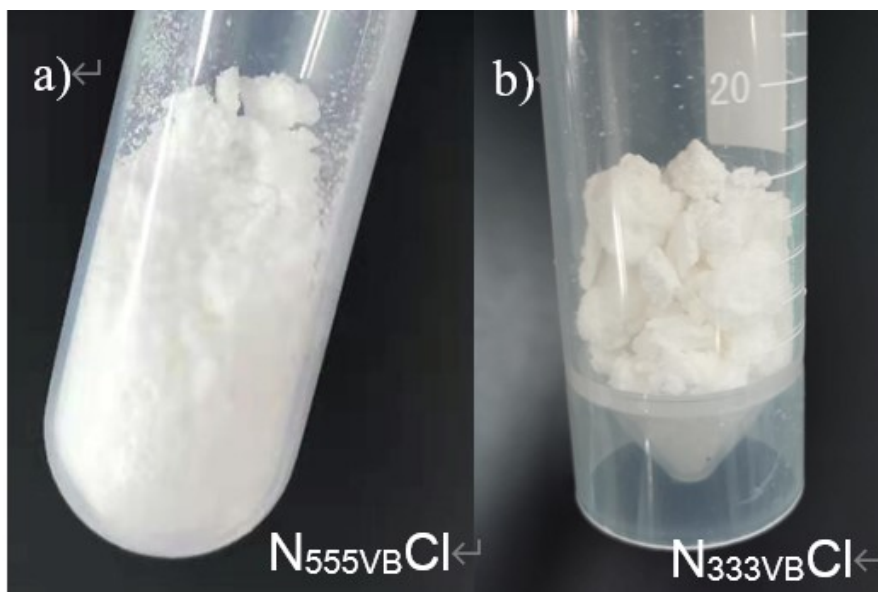

**Fig. S2** Photographs of a) N<sub>555</sub>VBCl, b) N<sub>333</sub>VBCl.

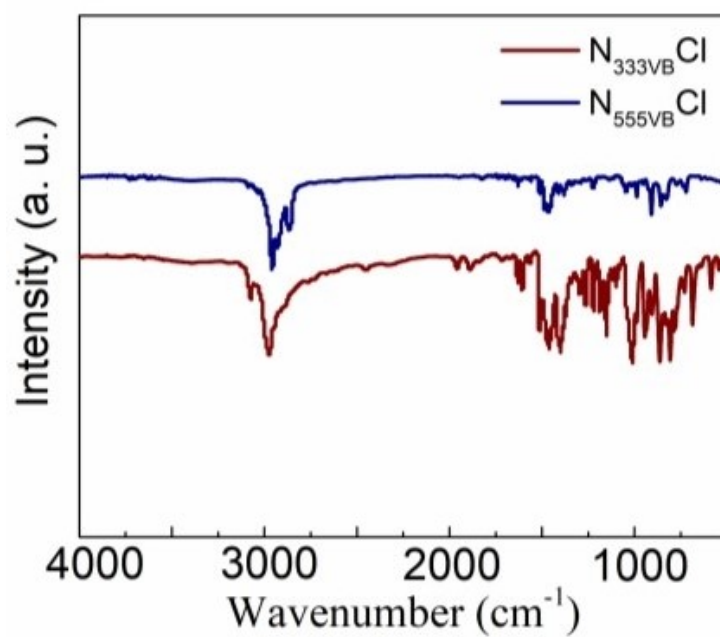

**Fig. S3** FTIR of N<sub>555VB</sub>Cl and N<sub>333VB</sub>Cl monomer.

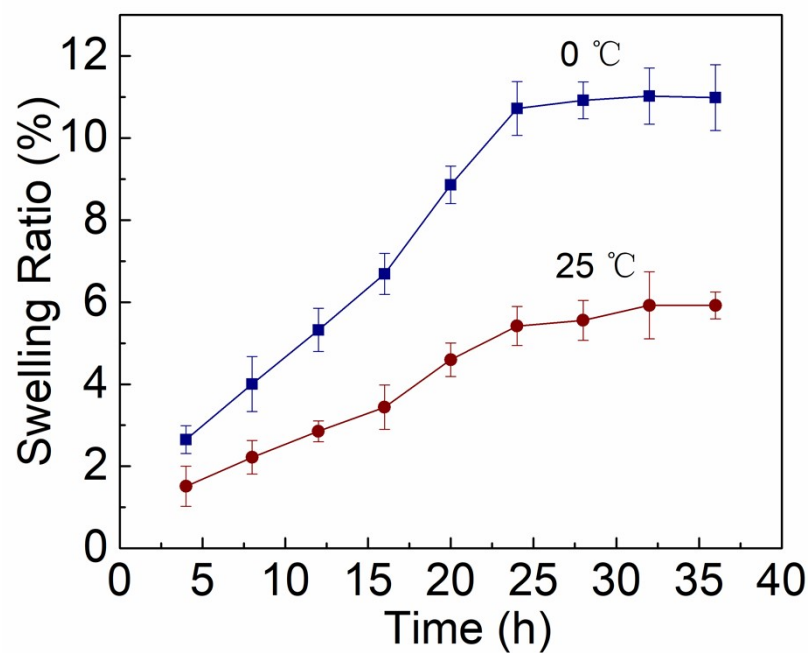

**Fig. S4** The compression curves of PNCI-2 hydrogel.

The PNCI-2 hydrogel can better absorb water at 0 °C than 25 °C. The hydrogel would reach saturation after soaking in 600 mmol L<sup>-1</sup> saline for 24 h.

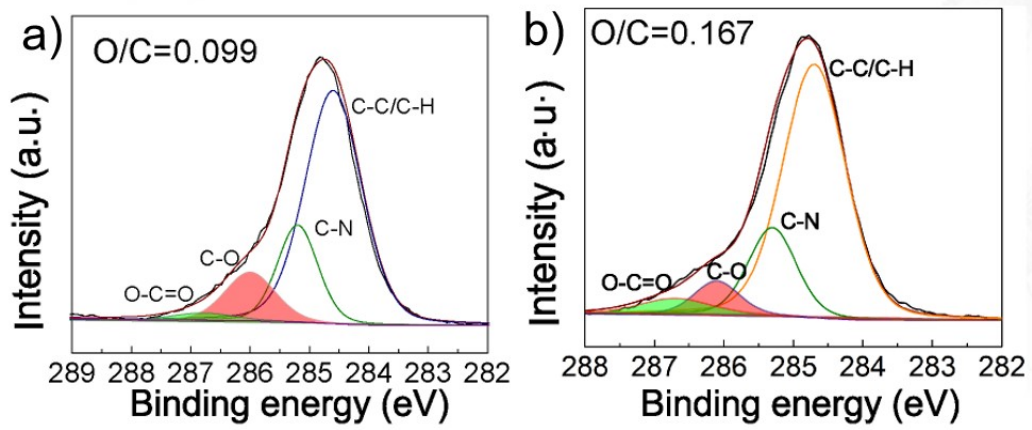

Fig. S5 XPS spectra of e) PNCl-1 hydrogel, f) PNCl-2 hydrogel.

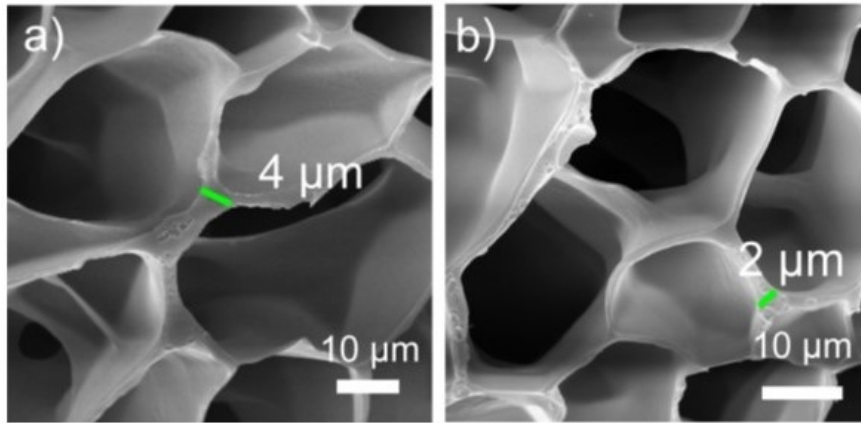

**Fig. S6** SEM images of a) PNCl-1hydrogel, and b) PNCl-2 hydrogel.

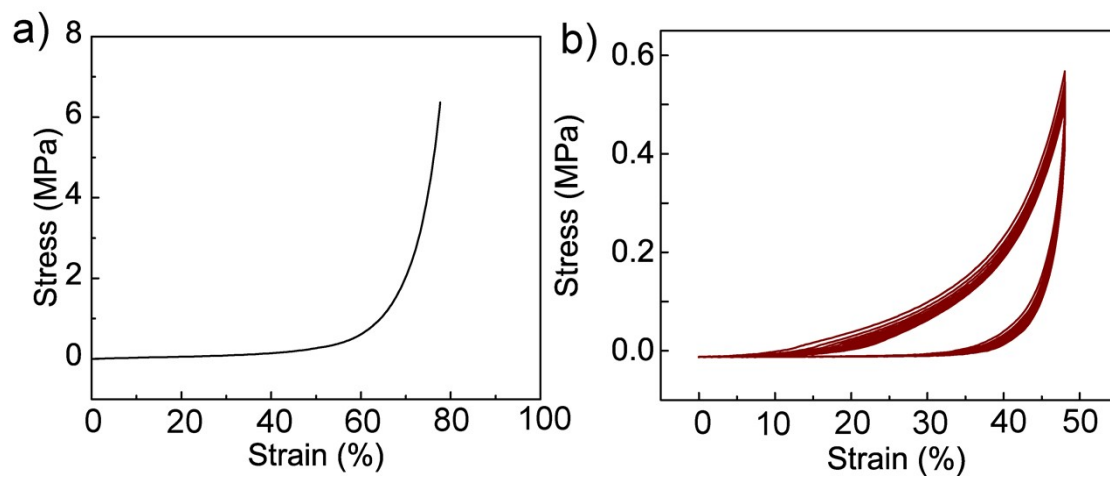

**Fig. S7** The compression curves of PNCl-2 hydrogel.

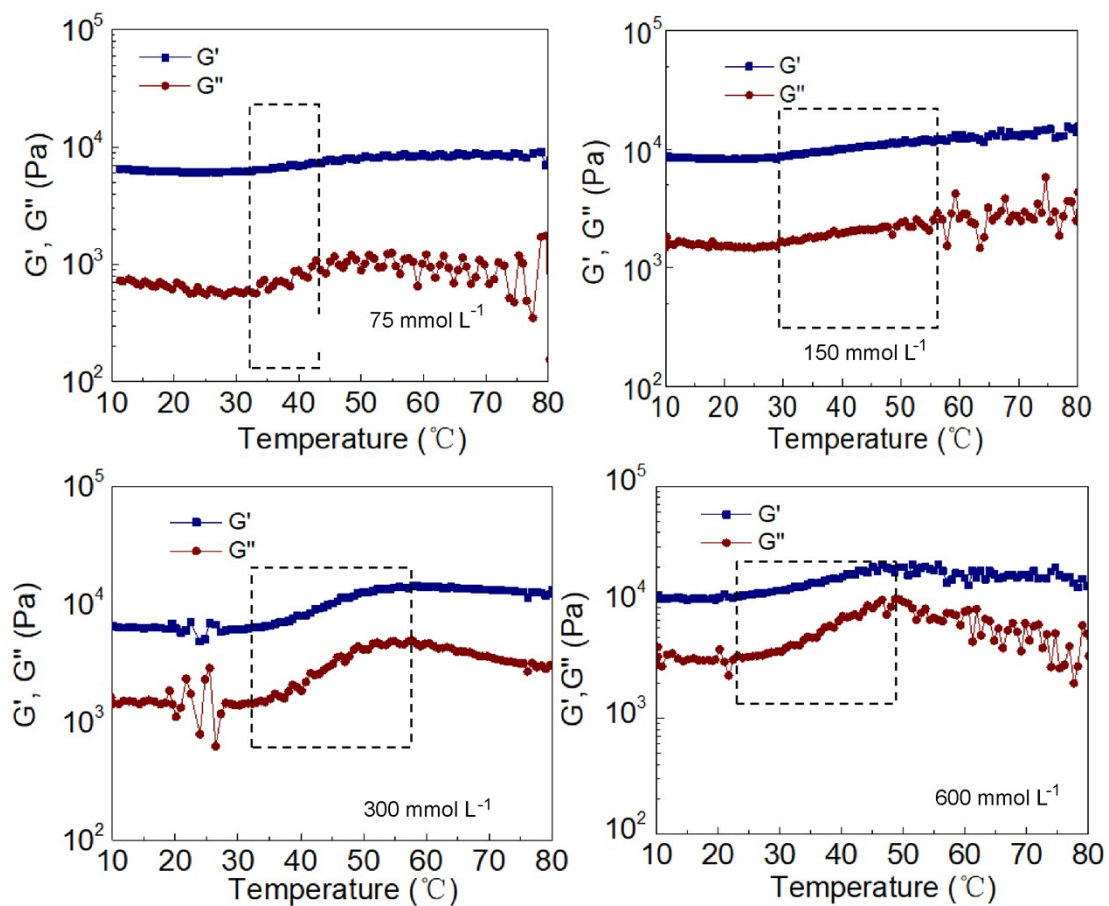

**Fig. S8** The variation of  $G'$  and  $G''$  as a function of temperature for PNCl-2 hydrogel immersed in 75-600 mmol L<sup>-1</sup> NaCl solutions.



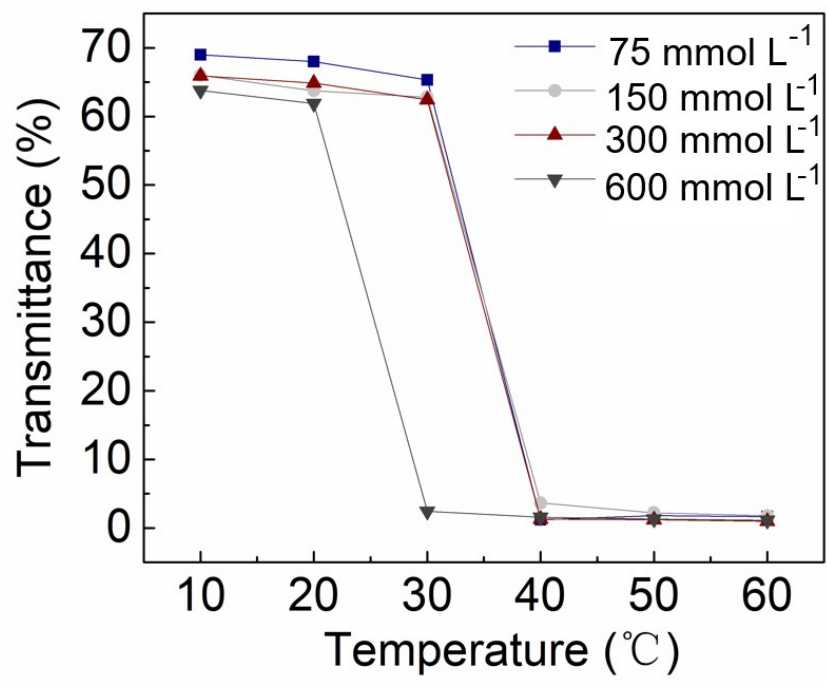

**Fig. S9** The variation of transmittance as a function of temperature for PNCl-2 hydrogel.

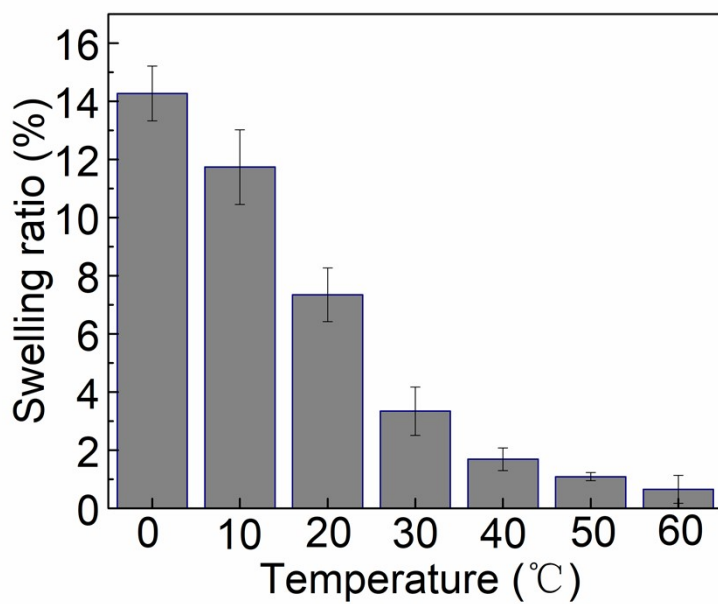

**Fig. S10** Swelling degree of PNCl-2 with DC=0.1% in 600 mmol/L NaCl solution.

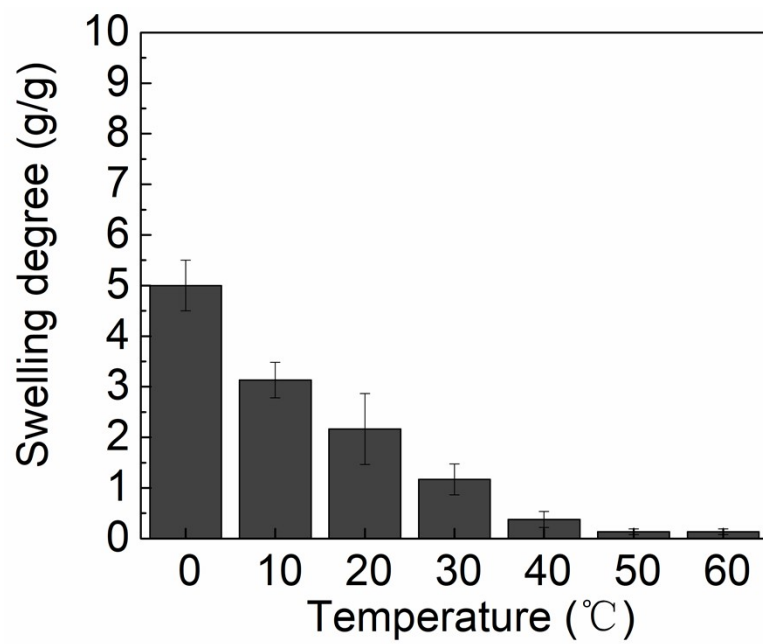

**Fig. S11** Swelling degree of PNCl-2 with DC=0.3% in 600 mmol/L NaCl solution.

Table S1 The atoms percentage (C, Cl, N, O) of PNCI-1gel, PNCI-2gel.

| The type of gel | Atom percentage of C (%) | Atom percentage of Cl (%) | Atom percentage of N (%) | Atom percentage of O (%) |
|-----------------|--------------------------|---------------------------|--------------------------|--------------------------|
| PNCI-1gel       | 89.60                    | 3.17                      | 4.28                     | 2.95                     |
| PNCI-2gel       | 87.68                    | 3.90                      | 5.82                     | 2.61                     |

Table S2 The weight percentage (C, Cl, N, O) of PNCI-1gel, and PNCI-2gel.

| The type of gel | The weight percentage of C (%) | The weight percentage of Cl (%) | The weight percentage of N (%) | The weight percentage of O (%) |
|-----------------|--------------------------------|---------------------------------|--------------------------------|--------------------------------|
| PNCI-1gel       | 83.06                          | 8.67                            | 4.62                           | 3.65                           |
| PNCI-2gel       | 80.12                          | 10.51                           | 6.20                           | 3.17                           |

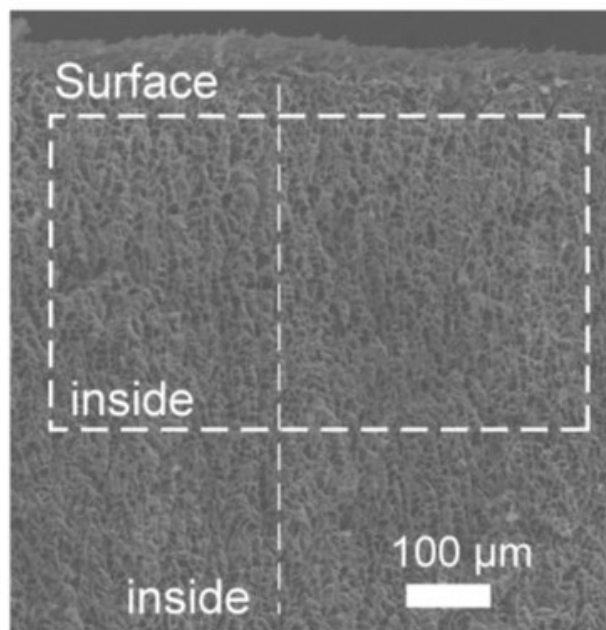

**Fig. S12** SEM images of PNCl-2 hydrogel after immersion in 600 mmol L<sup>-1</sup> NaCl.

It presents the area range of the mapping from the surface to the interior of the PNCl-2 hydrogel gel.

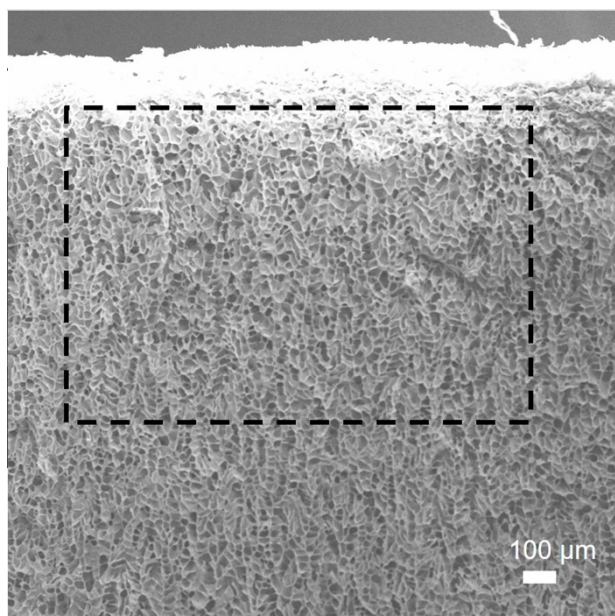

**Fig. S13** SEM images of PNCl-2 hydrogel after immersion in 300 mmol L<sup>-1</sup> Na<sub>2</sub>SO<sub>4</sub>.

It presents the area range of the mapping from the surface to the interior of the PNCl-2 hydrogel.

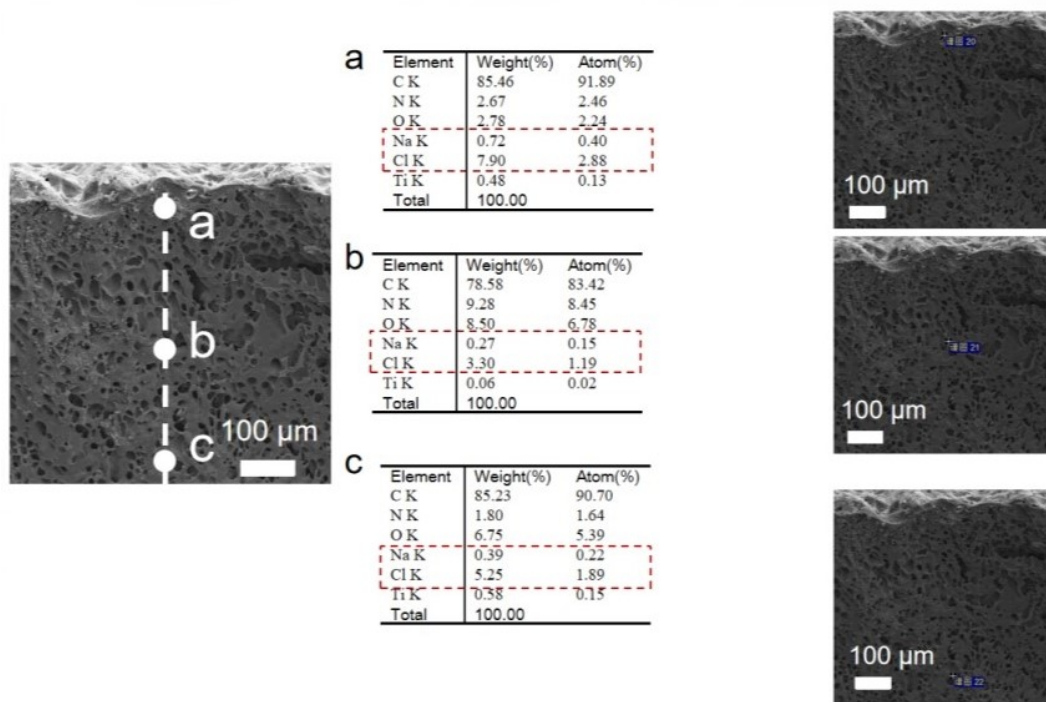

**Fig. S14** SEM images and EDX of TPIL hydrogel after immersion in 600 mmol L<sup>-1</sup> NaCl.

It presents the SEM images from the top to the bottom of the TPIL hydrogel after immersion in 600 mmol L<sup>-1</sup> NaCl. Elemental-distribution mapping with energy-dispersive X-ray spectrometry (EDX) reveals the element content (C, N, O, Ti, Cl, Na) of the three-point separately. As seen, the atomic content of Na and Cl in point b is significantly lower than that in points a and c on the surface.

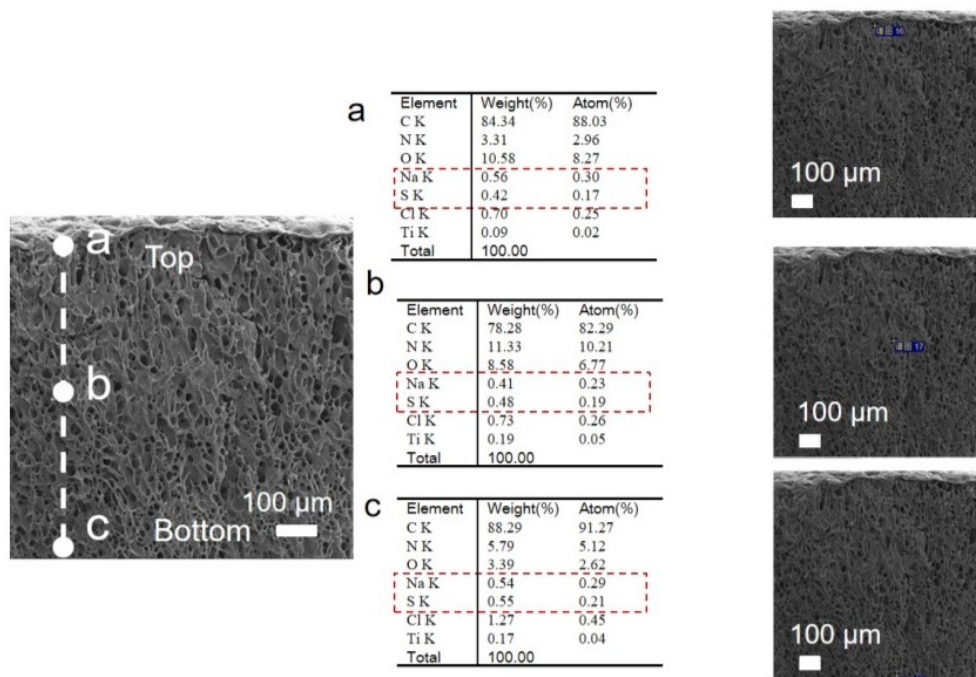

**Fig. S15** SEM images and EDX of TPIL hydrogel after immersion in 300 mmol L<sup>-1</sup> Na<sub>2</sub>SO<sub>4</sub>.

It presents the SEM images from the top to the bottom of the TPIL hydrogel after immersion in 300 mmol L<sup>-1</sup> Na<sub>2</sub>SO<sub>4</sub>. Elemental-distribution mapping with energy-dispersive X-ray spectrometry (EDX) reveals the element content (C, N, O, Ti, Cl, Na) of the three-point separately. As seen, the atomic content of Na and S in point b is not much different from that in points a and c on the surface.



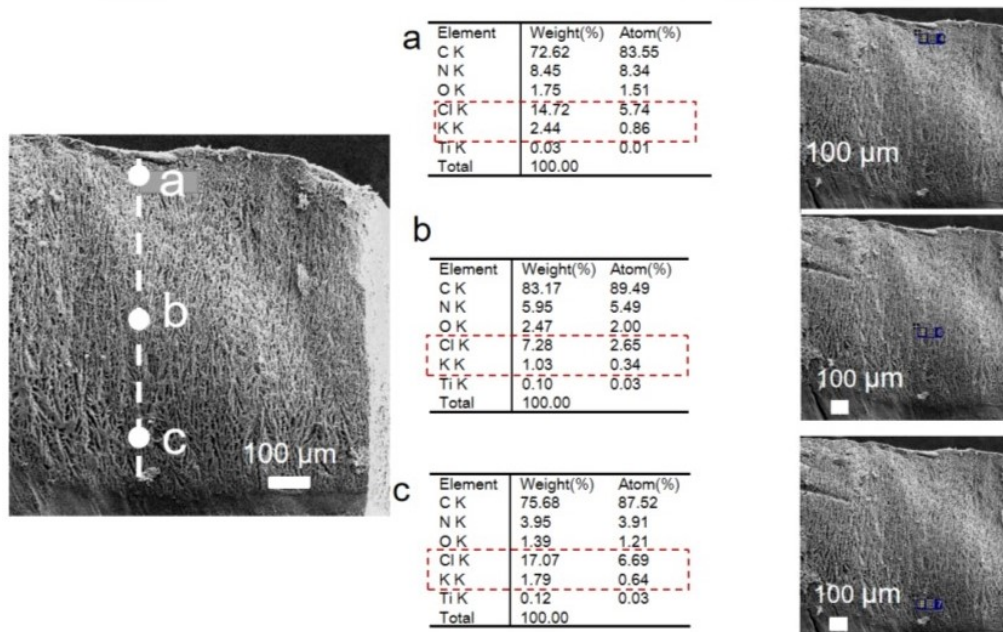

**Fig. S16** SEM images and EDX of TPIL hydrogel after immersion in 600 mmol/L KCl.

It presents the SEM images from the top to the bottom of the TPIL hydrogel after immersion in 600 mmol L<sup>-1</sup> KCl. Elemental-distribution mapping with energy-dispersive X-ray spectrometry (EDX) reveals the element content (C, N, O, Ti, Cl, K) of the three-point separately. As seen, the atomic content of K and Cl in point b is significantly lower than that in points a and c on the surface.

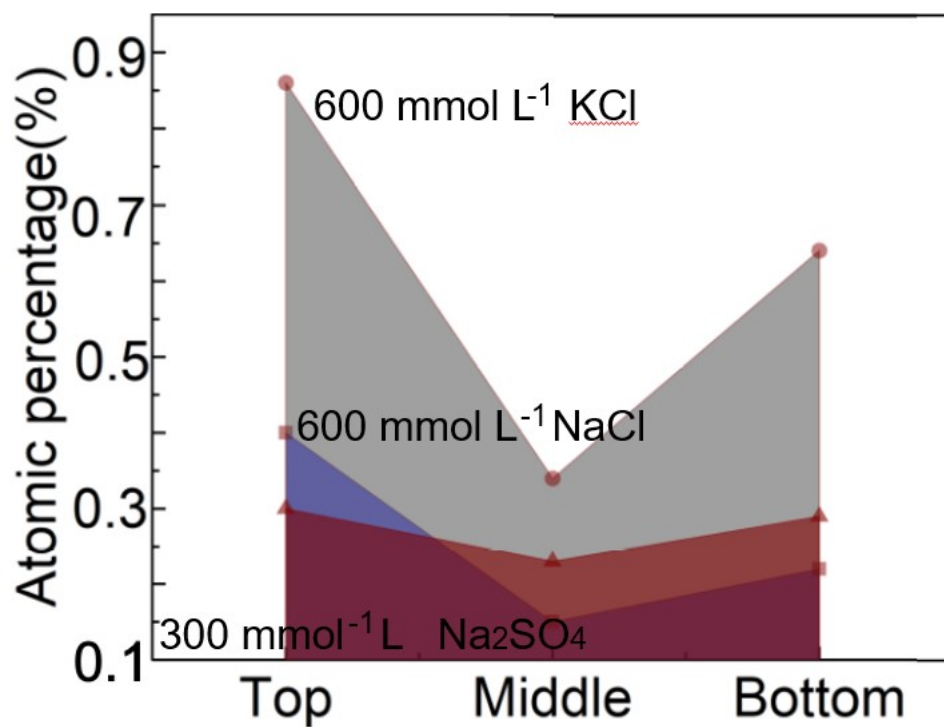

**Fig. S17** The variation of atomic percentage of TPIL hydrogel soaked in 600 mmol L<sup>-1</sup> NaCl, KCl, and 300 mmol/L Na<sub>2</sub>SO<sub>4</sub> from top to bottom.

The atomic content of Na<sup>+</sup> and K<sup>+</sup> in NaCl and KCl in point b is significantly lower than that in points a and c on the surface. The atomic content of Na<sup>+</sup> in Na<sub>2</sub>SO<sub>4</sub> in point b is not much different from that in points a and c on the surface.

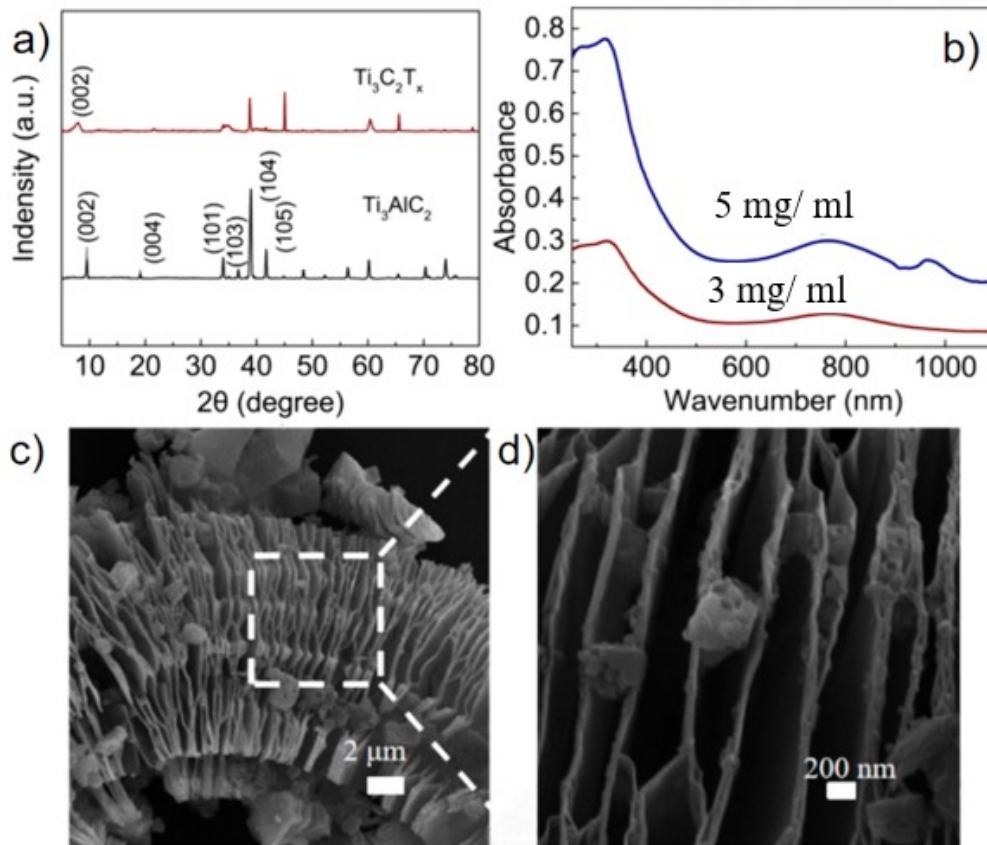

**Fig. S18** The characterization of  $\text{Ti}_3\text{C}_2\text{T}_x$  MXene. a) X-ray diffraction (XRD) peak showing shifts of the (002) peak and the attenuation of (101), (103), (104), (105) due to the etching of the Al layer. b) UV-vis-NIR absorbance spectra of MXene (3, 5 mg ml<sup>-1</sup>). c, d) The SEM morphology of  $\text{Ti}_3\text{C}_2\text{T}_x$  MXene.

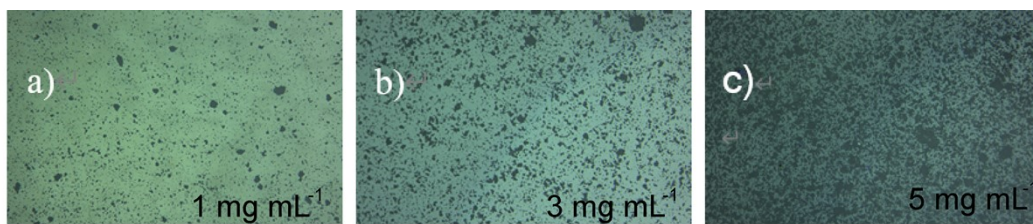

**Fig. S19** The distribution of MXene in gels with different concentrations was observed by an optical microscope. a)  $1 \text{ mg mL}^{-1}$  MXene, b)  $2 \text{ mg mL}^{-1}$  MXene, c)  $5 \text{ mg mL}^{-1}$ .

The distribution of different concentrations of MXene in the gels changed from sparse to agglomerated, and the distribution of  $3 \text{ mg mL}^{-1}$  MXene is uniform.

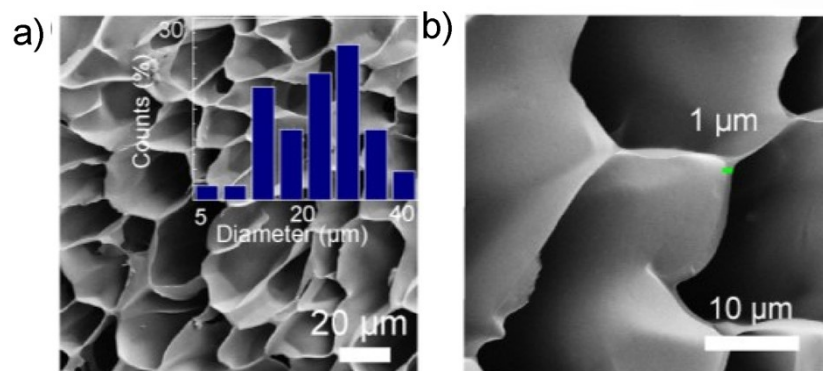

**Fig. S20** a, b) The morphology of  $\text{Ti}_3\text{C}_2\text{T}_x$ , MXene/IL hydrogels, and high-resolution image of MXene/IL gels.

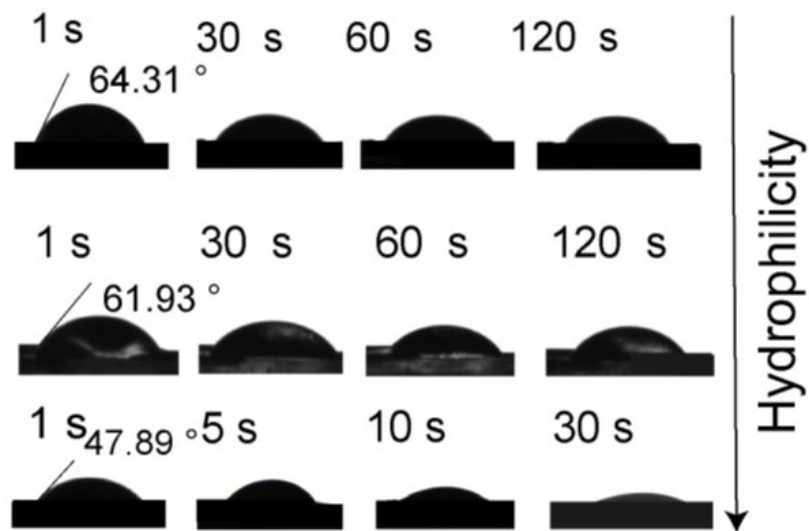

**Fig. S21** Optical images showing the dynamic wetting behaviors of a water droplet atop PNCl-1 hydrogel (top), PNCl-2 hydrogel (middle), and MXene/IL composite gel (bottom) at room temperature, as a function of time.

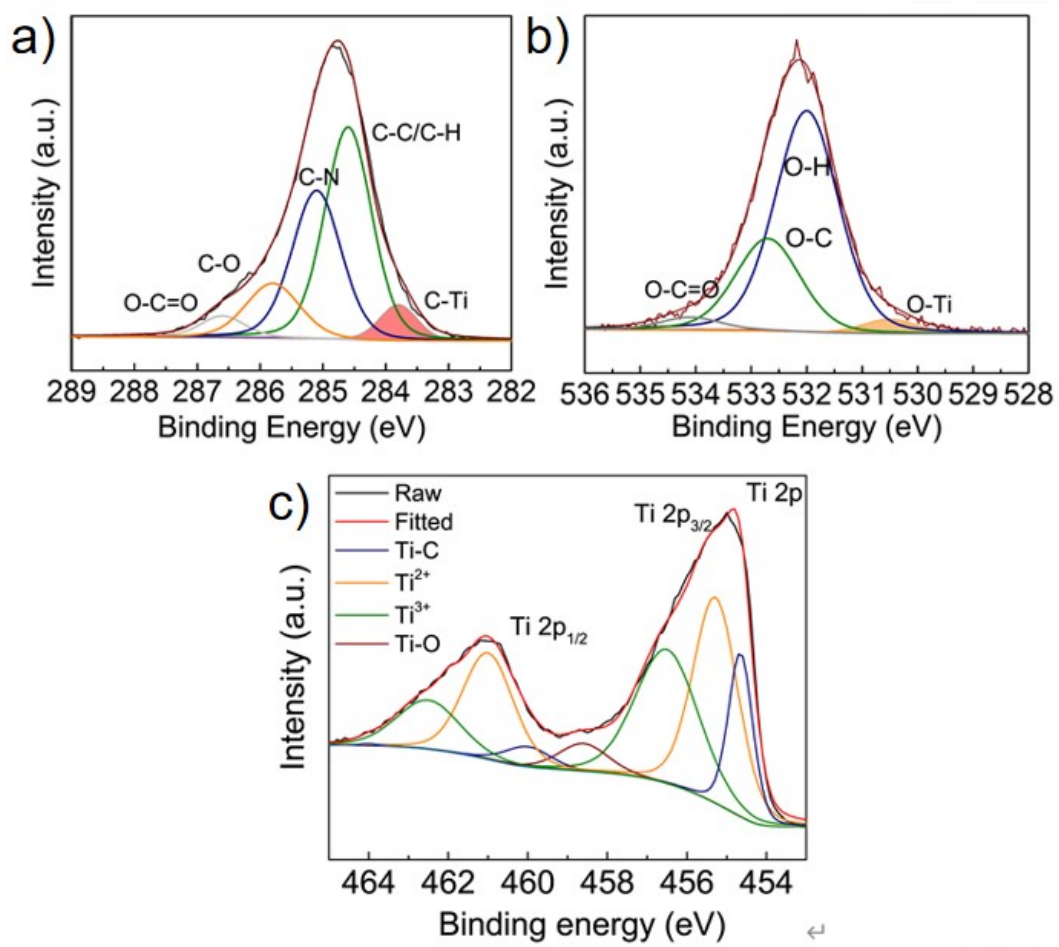

**Fig. S22** XPS spectra data of a) C 1s, b) O 1s, c) Ti 2p of MXene/IL gel

As seen in **Figure S20** The MXene/IL gel has stronger C-O and O-C=O peaks and appears C-Ti, O-Ti, Ti-C, and Ti-O peaks, which results from the successful introduction of hydrophilic MXene.

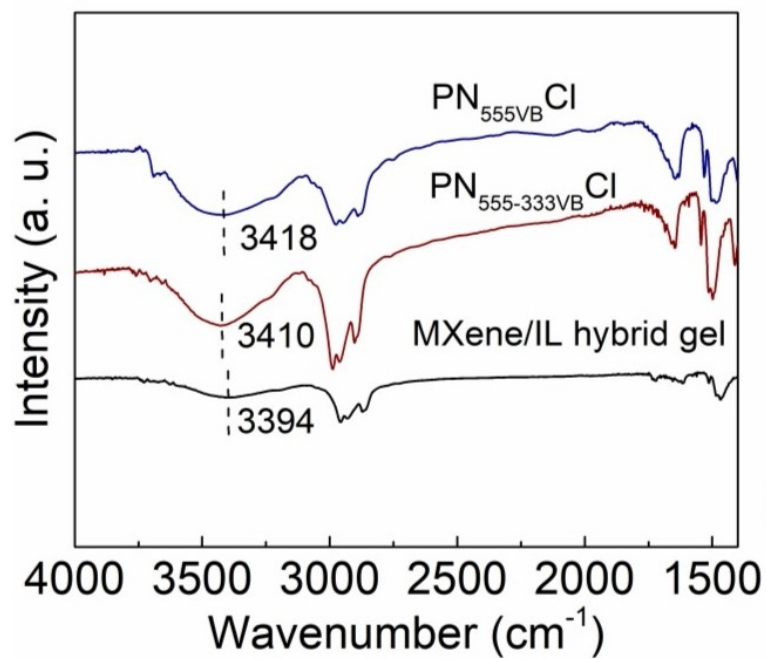

**Fig. S23** FTIR of PNCl-2 hydrogel and MXene/IL hydrogel.

The peak for stretching vibration of -OH is red-shifted from 3418 cm<sup>-1</sup> for the PNCl-1gel to 3394 cm<sup>-1</sup> for the weakened absorption peak of MXene/IL hydrogel, demonstrating the hydrogen bonding between IL monomer and MXene nanosheets.



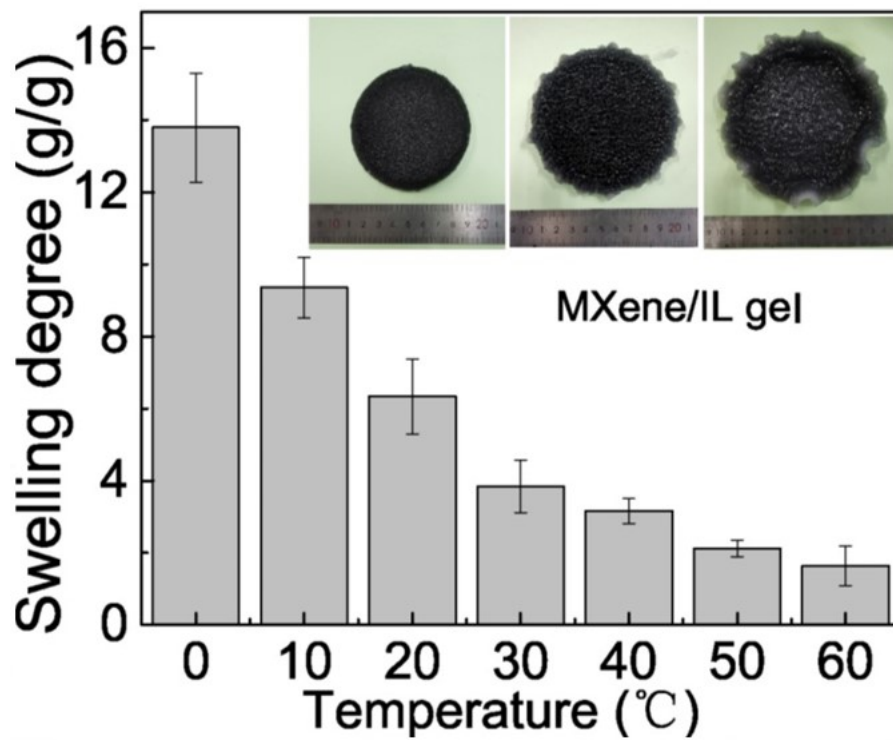

**Fig. S24** Swelling degree of MXene/IL hydrogel immersed in 600 mmol L<sup>-1</sup> NaCl as a function of temperature.

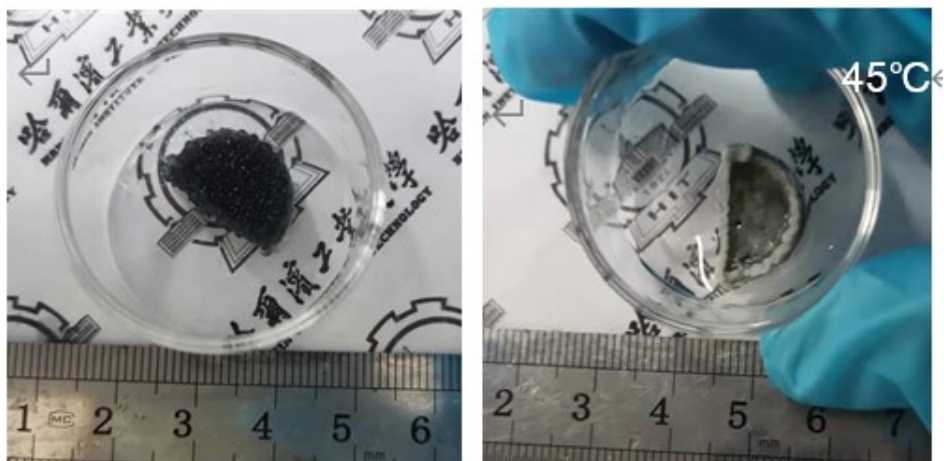

**Fig. S25** Photographs of a) MXene/IL hydrogel at room temperature, b) MXene/IL hydrogel after heating.

The TPIL hydrogels after the addition of MXene will not affect the phase transition to release water.

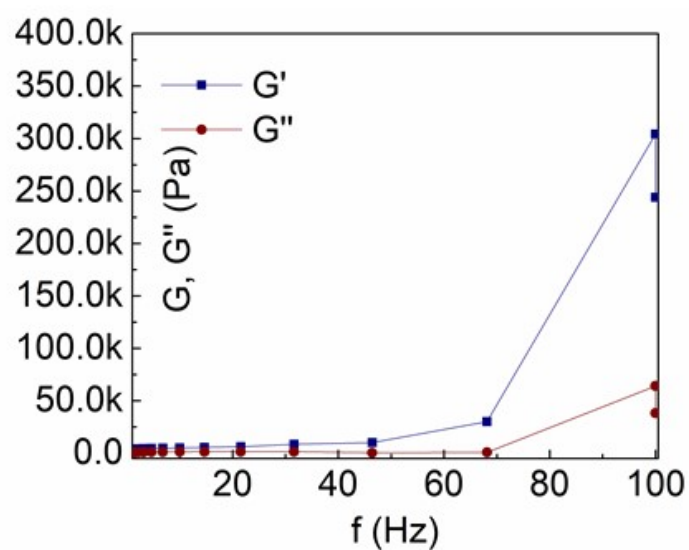

**Fig. S26** The  $G'$  and  $G''$  vary with frequency for MXene/IL hydrogel.

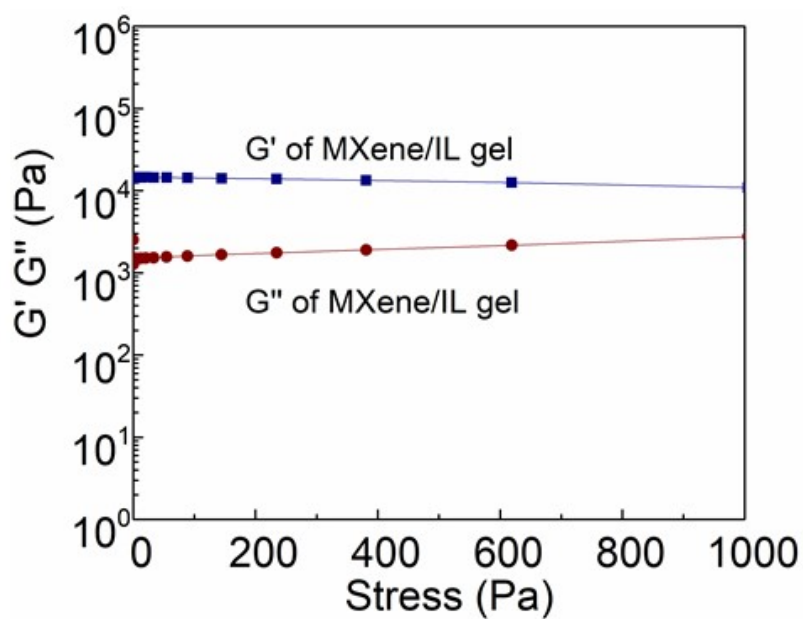

**Fig. S27** Storage modulus ( $G'$ ) and loss modulus ( $G''$ ) as functions of stress for MXene/IL hydrogel

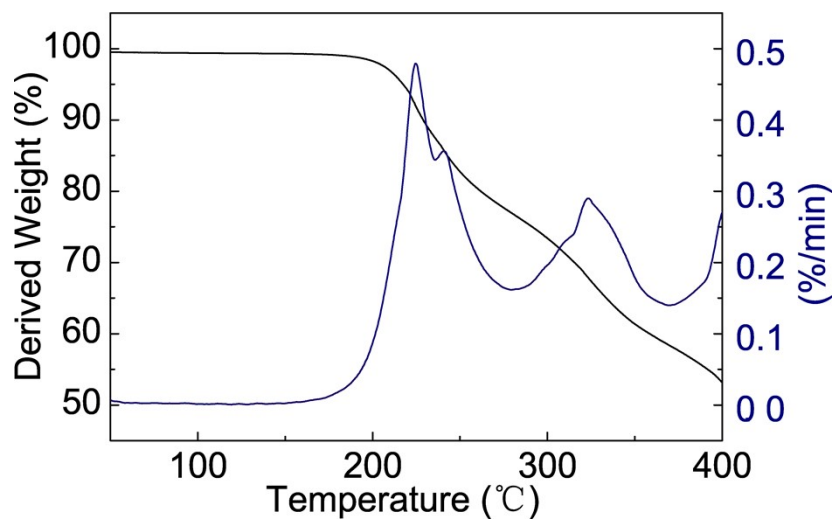

**Fig. S28** The TG and DTG curves of MXene/IL hydrogel.

## Reference

- 1 T. Richter, J. Landsgesell, P. Košovan, C. Holm, *Desalination*, 2017, **414**, 28.
